# Supplementary material for: A zero-dimensional lead-free bismuth-based metal halide: [C6H5(CH2)2CH(NH3)CH3]2BiCl5
Source: Royal Society of Chemistry journal article supplement (doi:10.1039/d2nj04382c), 2022-01-01
Supplement: d2nj04382c1.pdf [file d2nj04382c1.pdf]

## Supporting information for

### Zero-Dimensional Lead-Free Bismuth-Based Metal Halide:

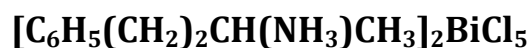

Wen Juan Wei,\* Hong Qiang Gao and Yun Zhi Tang

*Faculty of Materials Metallurgy and Chemistry, Jiangxi University of Science and Technology,  
Ganzhou 341000, China*

## Methods

### Synthesis

All chemicals and solvents were of reagent grade and used as received. Single crystals of  $\text{C}_6\text{H}_5(\text{CH}_2)_2\text{CH}(\text{NH}_3)\text{CH}_3$  (**MPA<sub>2</sub>-BiCl<sub>5</sub>**) are synthesized as follow:  $\text{BiCl}_3$  (1 mmol) was dissolved

in 4 mL concentrated hydrochloric acid HCl solution in a beaker. Then add 1-Methyl-3-phenylpropylaminium (2 mmol) to 2 mL H<sub>2</sub>O in another beaker. Whereafter, the latter was slowly dripped into the former along the wall.

### Thermal measurements

Thermogravimetric analysis (TGA) measurements of **MPA<sub>2</sub>-BiCl<sub>5</sub>** were performed on a TA-Instruments STD2960 system from 293 to 1050 K.

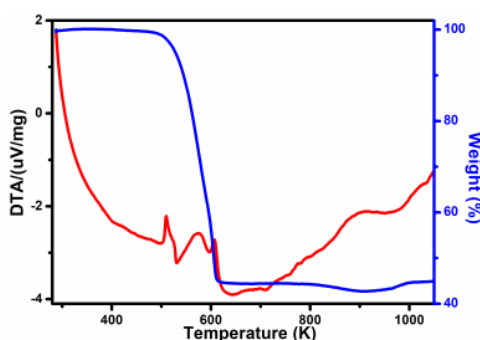

Figure S1. TG and DTA curves of **MPA<sub>2</sub>-BiCl<sub>5</sub>** between 300 and 1050 K.

### Single crystal X-ray diffraction

Single crystal X-ray diffractions were carried out with graphite monochromated Mo radiation ( $\lambda = 0.71073$  Å) on an Oxford Diffraction Gemini E Ultra diffractometer. Data sets were collected by using *CrysAlis<sup>Pro</sup>* software. The program Olex2-1.2 was employed as an interface to invoke program SHELXS97 and SHELXL97 executables.<sup>1</sup> The crystal structures were solved by direct methods with SHELXS97 and refined by full-matrix least squares on  $F^2$  with anisotropic atomic displacement parameters for all non-hydrogen atoms using SHELXL97.<sup>2,3</sup> All H atoms were located from molecular geometric calculations and refined with isotropic temperature parameters. The crystallographic information of **MPA<sub>2</sub>-BiCl<sub>5</sub>** determined at 100 K and 293 K are listed in the Table 1. The data can be obtained free of charge from the Cambridge Crystallographic Data Centre (CCDC) via [www.ccdc.cam.ac.uk/data\\_request/cif](http://www.ccdc.cam.ac.uk/data_request/cif) (CCDC 2219486 and 2217399).

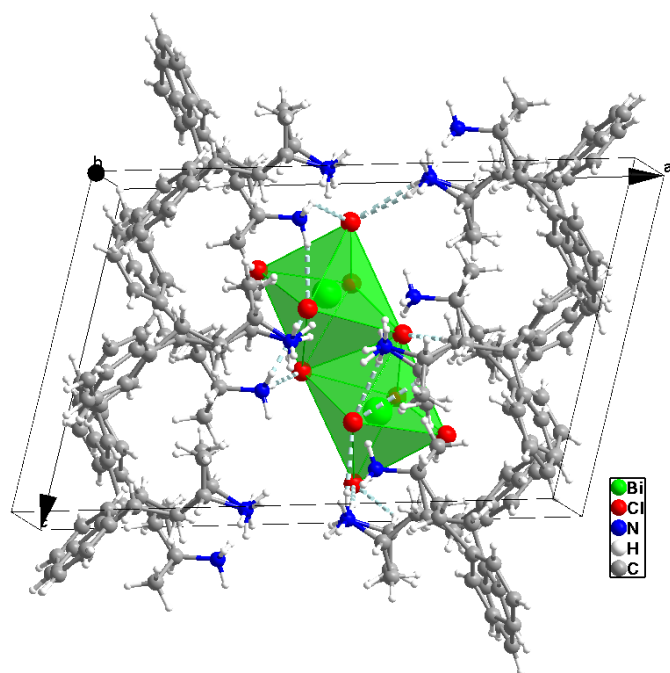

Figure S2. Asymmetric unit and the atom labeling scheme of  $\text{MPA}_2\text{-BiCl}_5$  at 100 K.

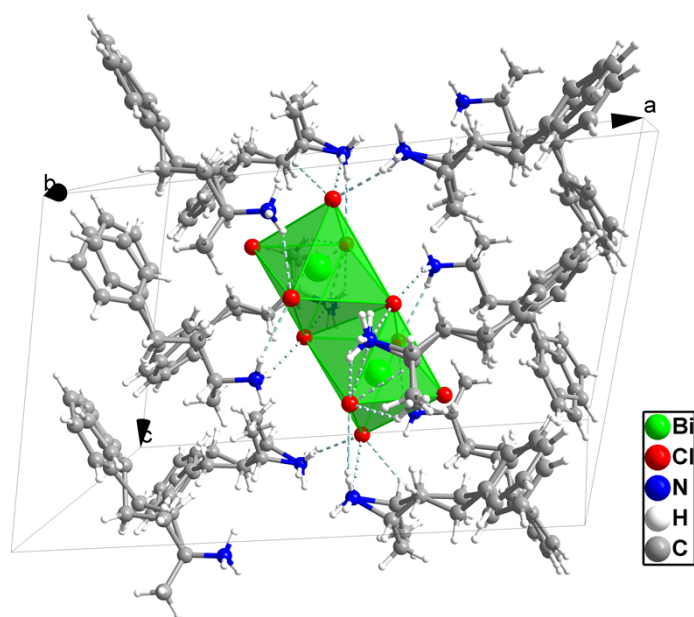

Figure S3. Asymmetric unit and the atom labeling scheme of  $\text{MPA}_2\text{-BiCl}_5$  at 293 K.

## UV-vis absorption spectra

UV-vis absorption spectra were obtained using a Shimadzu (Tokyo, Japan) UV-2550 spectrophotometer in a range of 200~800 nm. The powder crystals of three compositions were used for the measurement. The optical band gap was determined by a variant of the *Tauc* equation:<sup>4</sup>

$$[h\nu \cdot F(R_{\infty})]^{1/n} = A(h\nu - E_g)$$

where  $h$  is the Planck's constant,  $\nu$  represents the frequency of vibration,  $A$  is the proportional constant,  $E_g$  is the bandgap and  $F(R_{\infty})$  is Kubelka-Munk equation:<sup>5</sup>  $F(R_{\infty}) = (1 - R_{\infty})^2 / 2R_{\infty}$ . In addition,  $n=1/2$  stands for direct band gap, while  $n=2$  is indirect band gap.

### Density functional theory (DFT) calculations

The first-principles calculations were performed using the CASTEP code,<sup>6</sup> a total energy package based on pseudopotential density functional theory (DFT).<sup>7,8</sup> The correlation and exchange terms in the Hamiltonian were described by the functionals developed by Perdew, Burke and Ernzerhof (PBE)<sup>9</sup> in the generalized gradient approximation (GGA)<sup>10</sup> form. The optimized fine pseudopotential was adopted to model the effective interactions between the valence electrons and atomic cores, which allow us to choose a relatively small plane-wave basis set without compromising the computational accuracy. Kinetic energy cutoff 240 eV and dense Monkhorst-Pack<sup>11</sup> with medium  $k$ -point meshes interval in the Brillouin zones were chosen.

### Reference

- (1) Dolomanov, O. V.; Bourhis, L. J.; Gildea, R. J.; Howard, J. A.; Puschmann, H. OLEX2: a complete structure solution, refinement and analysis program. *J. Appl. Crystallogr.* **2009**, 42 (2), 339.
- (2) Sheldrick, G.; University of Göttingen, Germany Göttingen, **1997**.
- (3) SIR92, A. program for automatic solution of crystal structures by direct methods: A. Altomare, G. Cascarano, C. Giacovazzo, A. Guagliardi, MC Burla, G. Polidori, MJ Camalli, *J. Appl. Crystallogr.* **1994**, 27, 435.
- (4) Tauc, J. Absorption edge and internal electric fields in amorphous semiconductors. *Mater. Res. Bull.* **1970**, 5 (8), 721.
- (5) Kortüm, G.; Braun, W.; Herzog, G. Prinzip und Meßmethodik der diffusen Reflexionsspektroskopie. *Angew. Chem.* **1963**, 75 (14), 653.
- (6) Clark, S. J.; Segall, M. D.; Pickard, C. J.; Hasnip, P. J.; Probert, M. I. J.; Refson, K.; Payne, M. C. First principles methods using CASTEP. *Z. Krist.-Cryst. Mater.* **2005**, 220 (5/6).

- (7) Kohn, W.; Sham, L. J. Self-Consistent Equations Including Exchange and Correlation Effects. *Phys. Rev.* **1965**, *140* (4A), A1133.
- (8) Payne, M. C.; Teter, M. P.; Allan, D. C.; Arias, T.; Joannopoulos, a. J. Iterative minimization techniques for ab initio total-energy calculations: molecular dynamics and conjugate gradients. *Rev. Mod. Phys.* **1992**, *64* (4), 1045.
- (9) Perdew, J. P.; Burke, K.; Ernzerhof, M. Generalized gradient approximation made simple. *Phys. Rev. Lett.* **1996**, *77* (18), 3865.
- (10) Perdew, J. P.; Wang, Y. Pair-distribution function and its coupling-constant average for the spin-polarized electron gas. *Phys. Rev. B Condens. Matter* **1992**, *46* (20), 12947.
- (11) Monkhorst, H. J.; Pack, J. D. Special points for Brillouin-zone integrations. *Phys. Rev. B* **1976**, *13* (12), 5188.
